# Supplementary material
Source: MDPI journal article supplement (https://www.mdpi.com/2075-163X/10/11/1034)
Supplement: s1 [file s1]

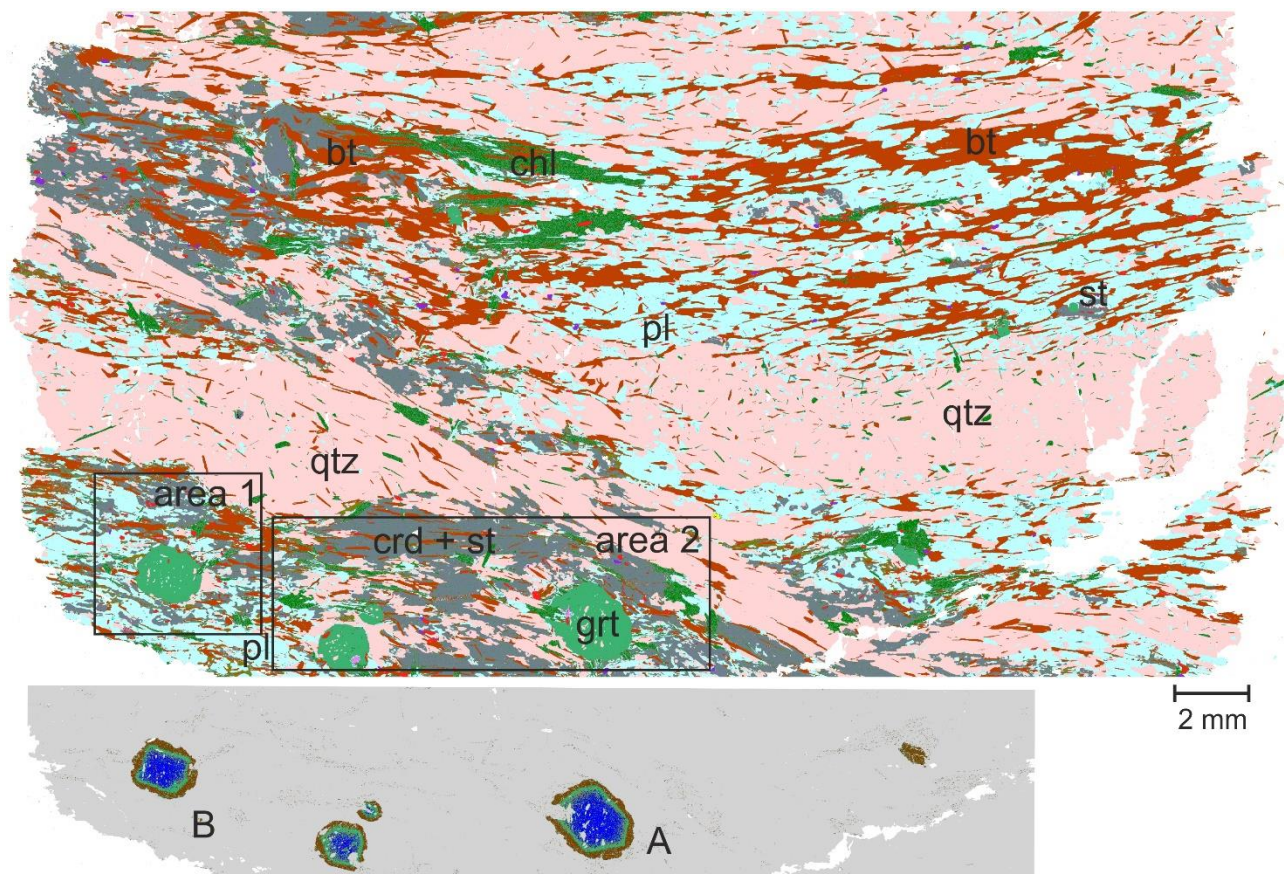

TTKI-2005-14.2



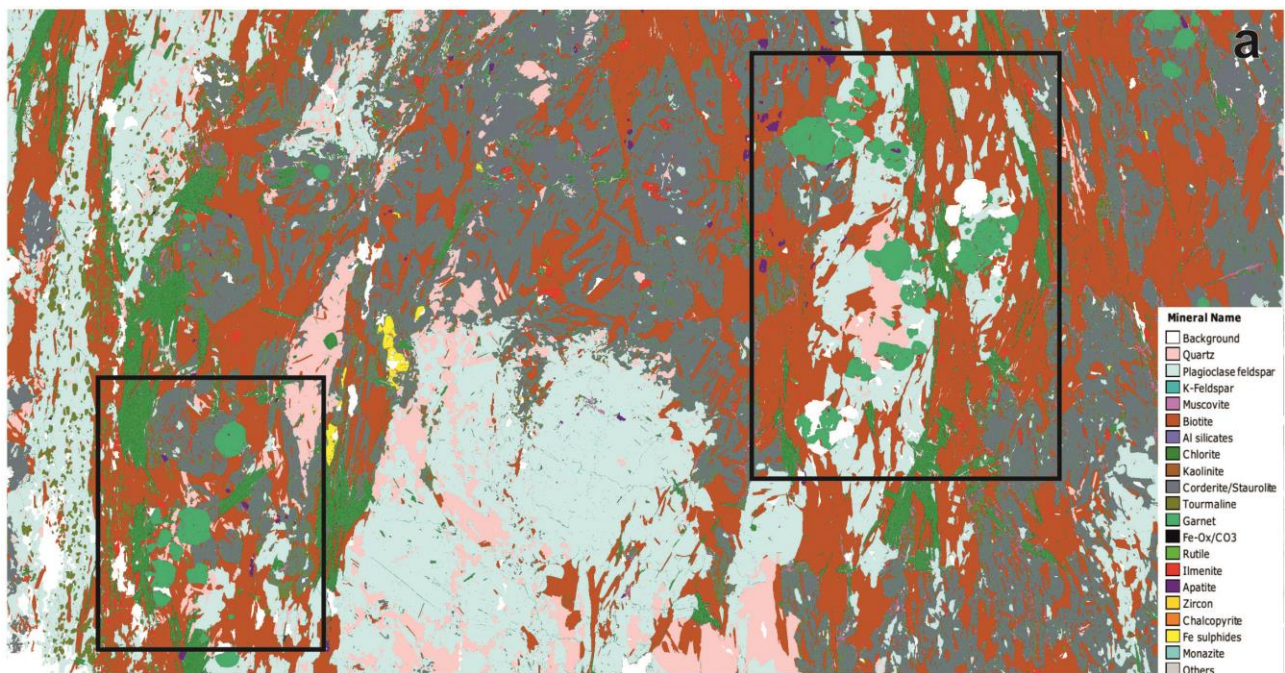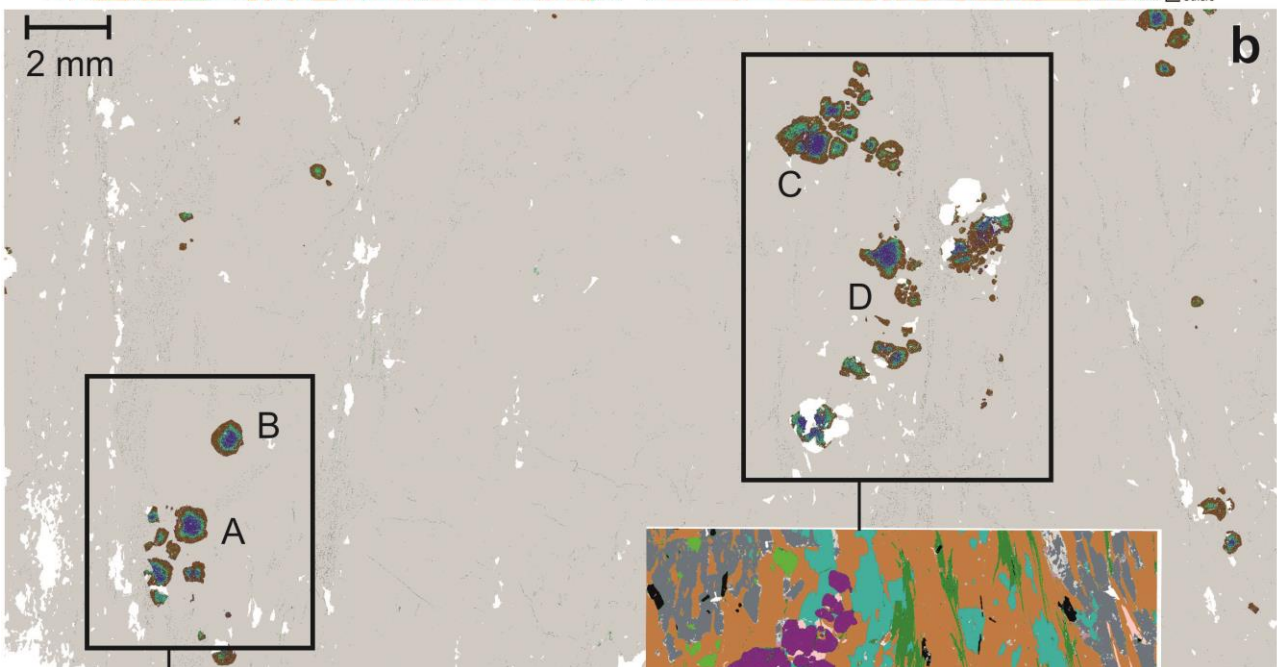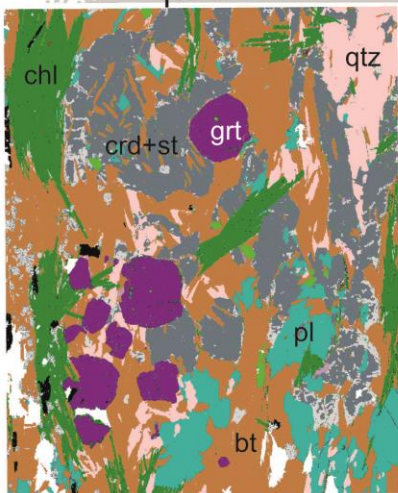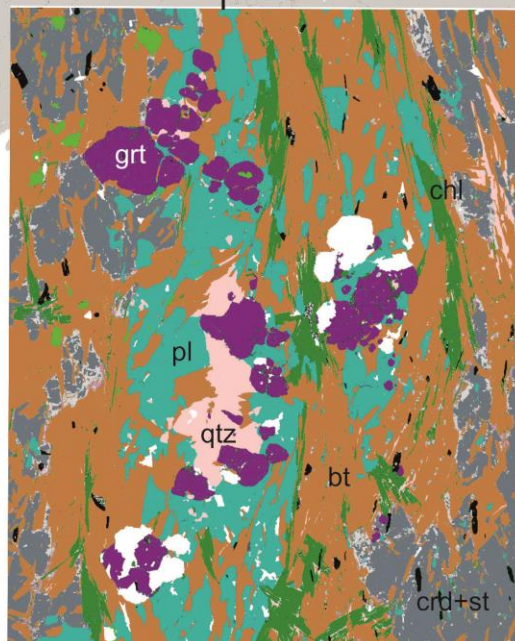

TTKI-2005-17.1



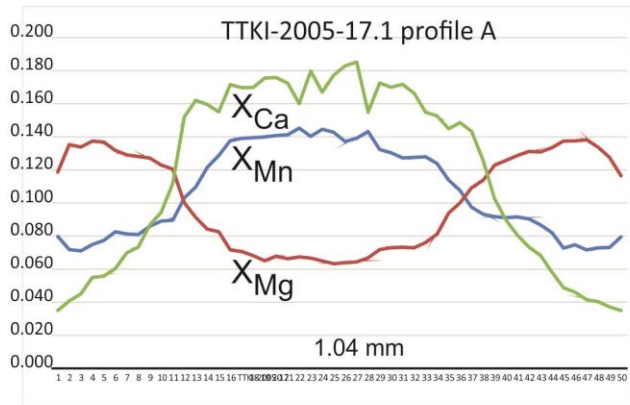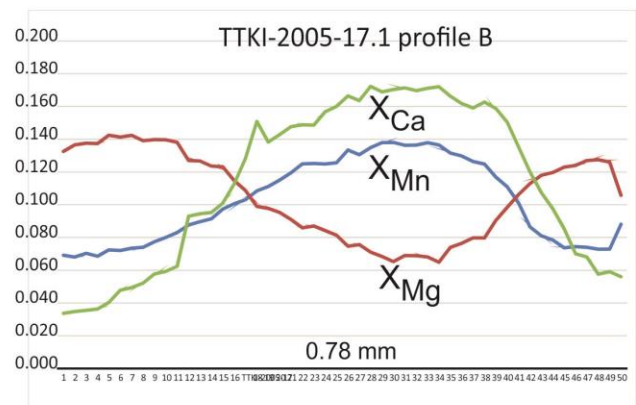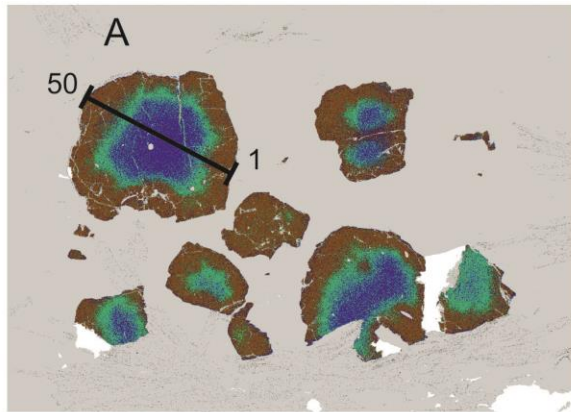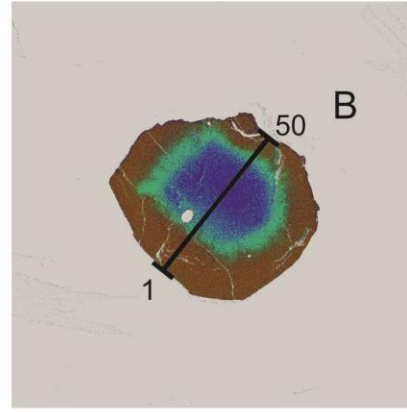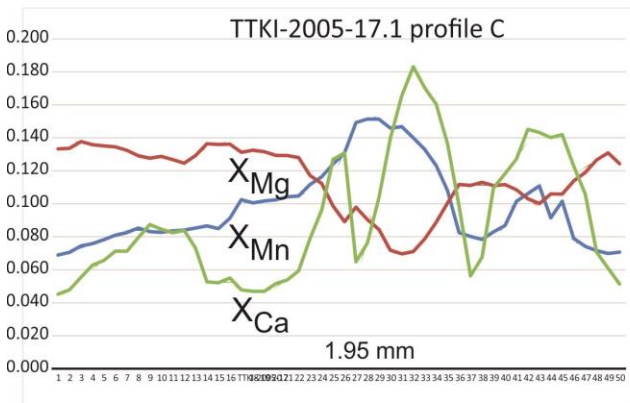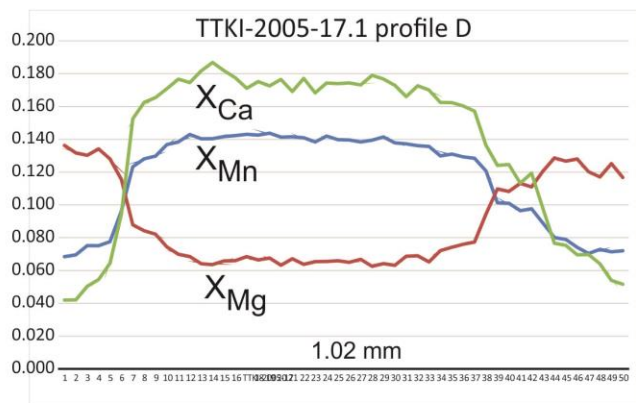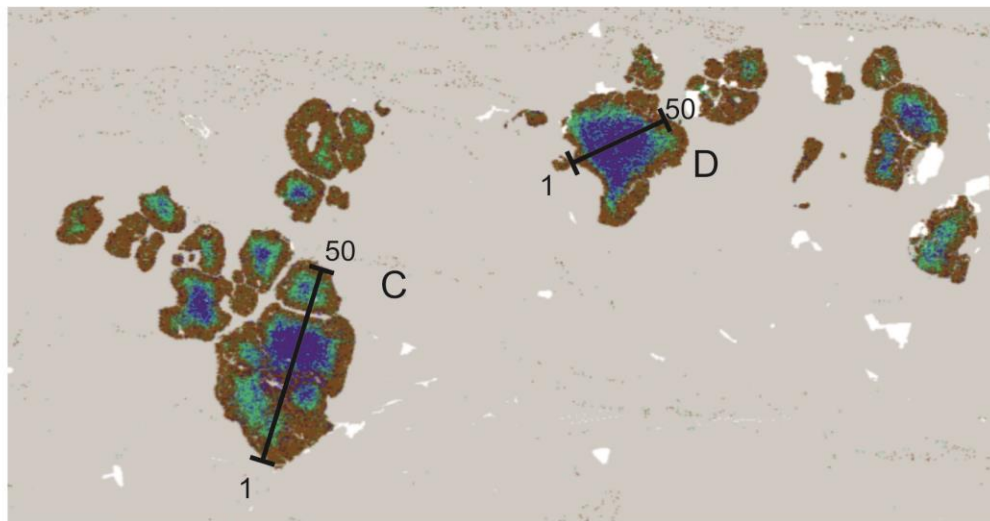



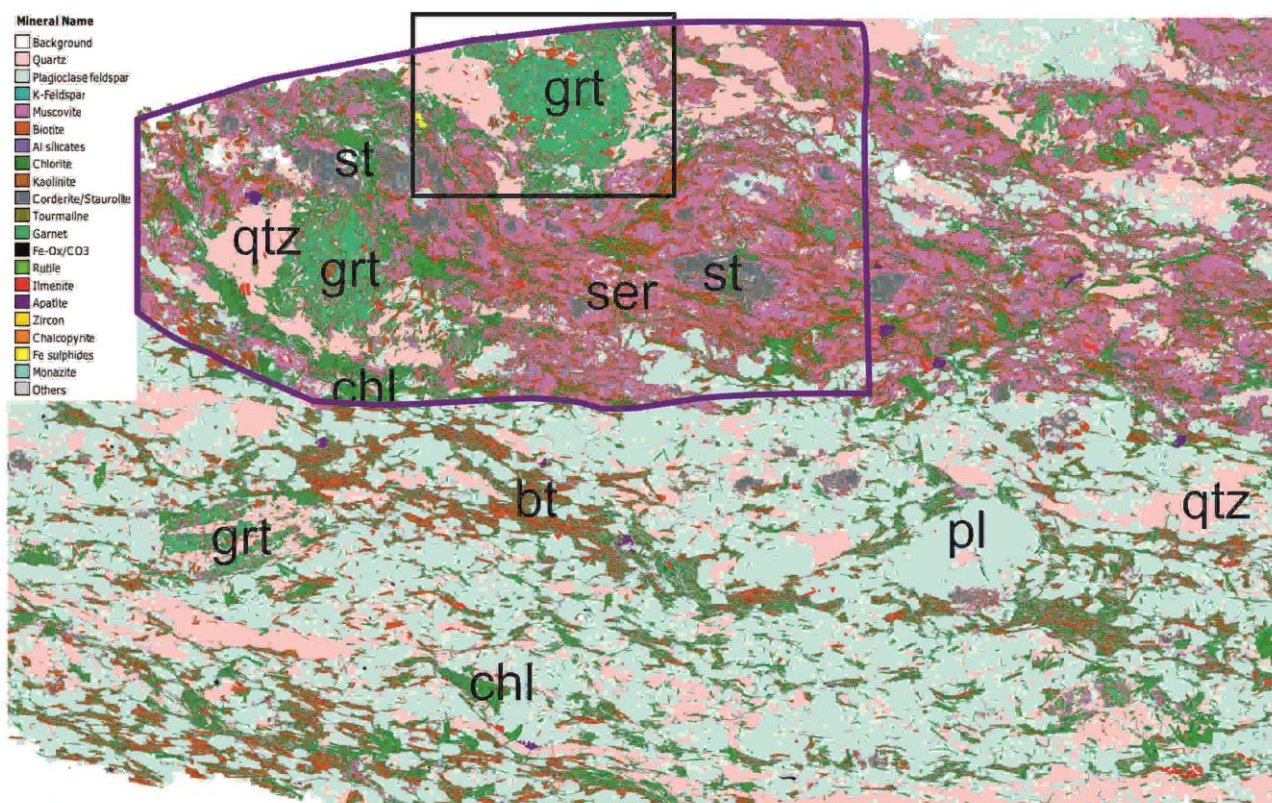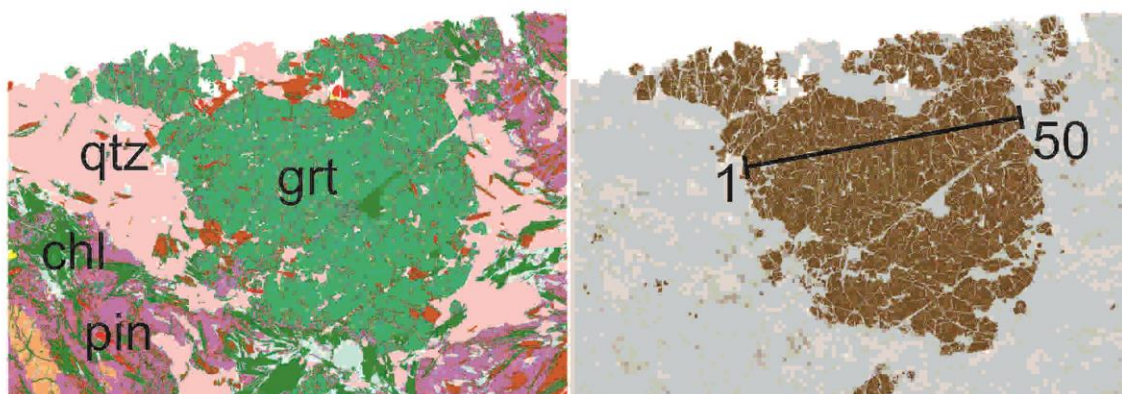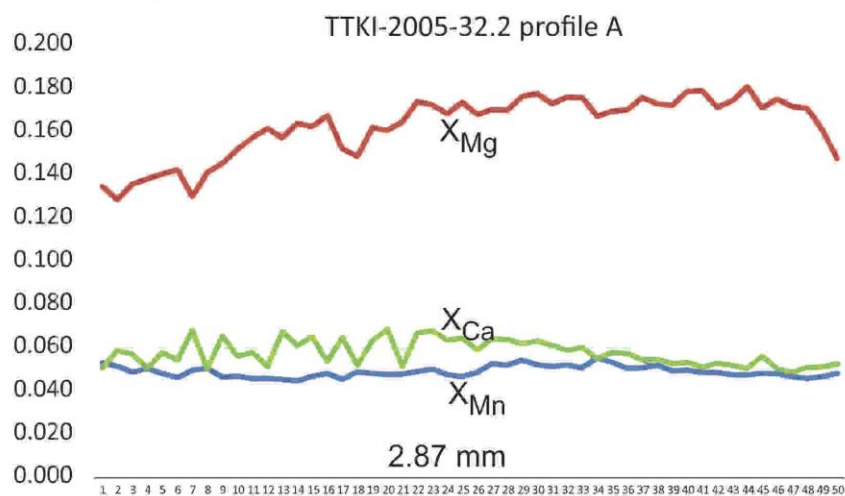

TTKI-2005-32.2. The calculated bulk composition of the area delineated with a violet line was used for calculating the pseudosection in Fig. 13d.



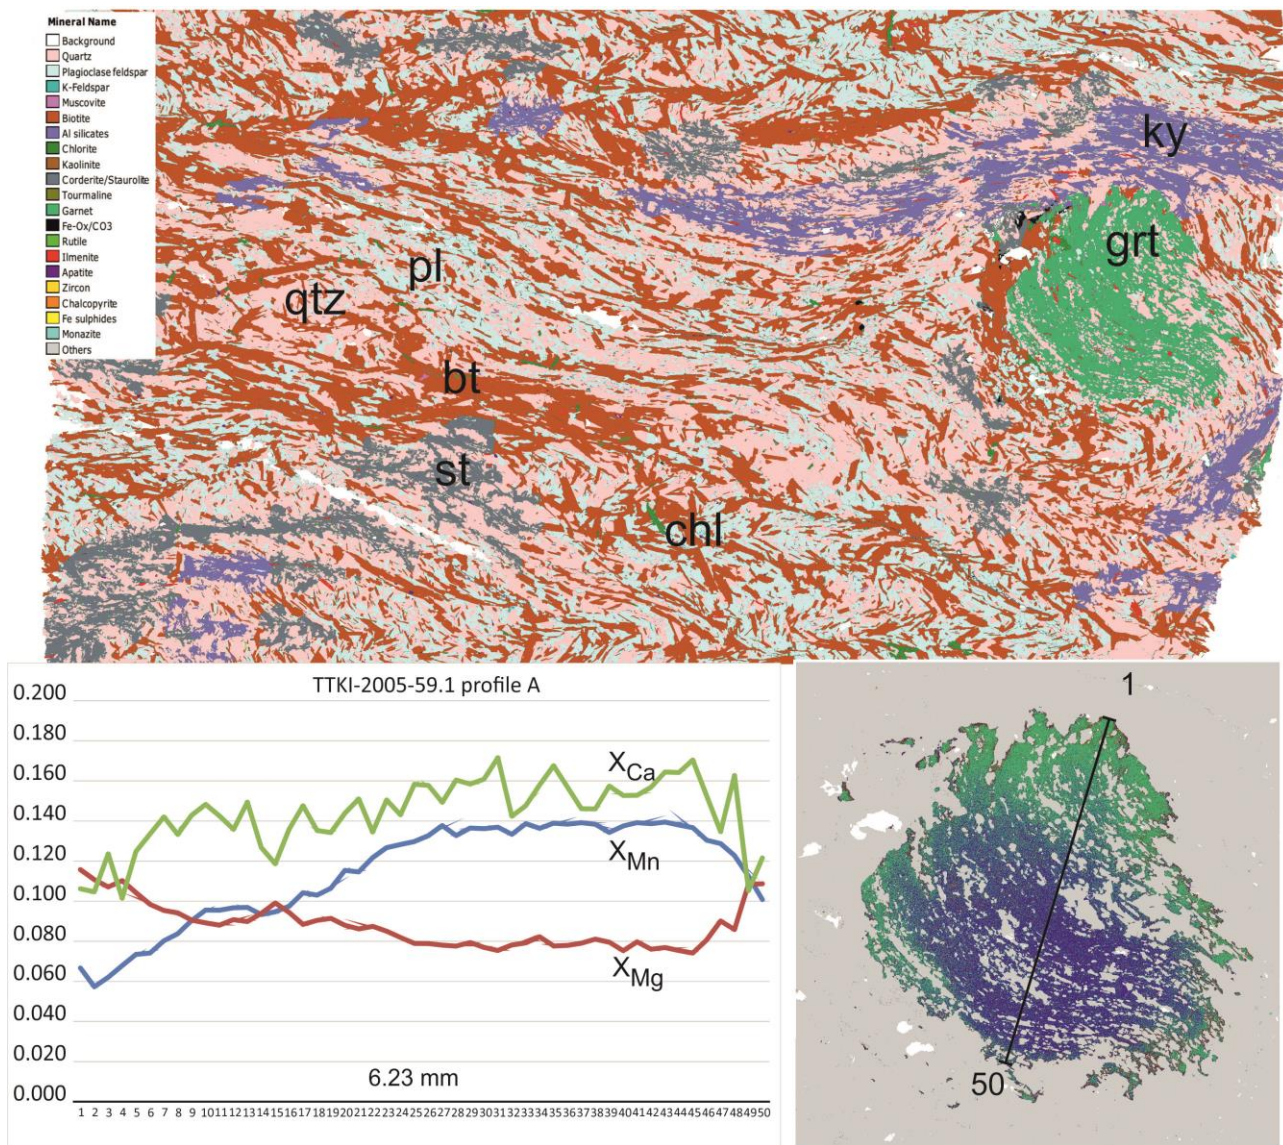

TTKI-2005-59.1



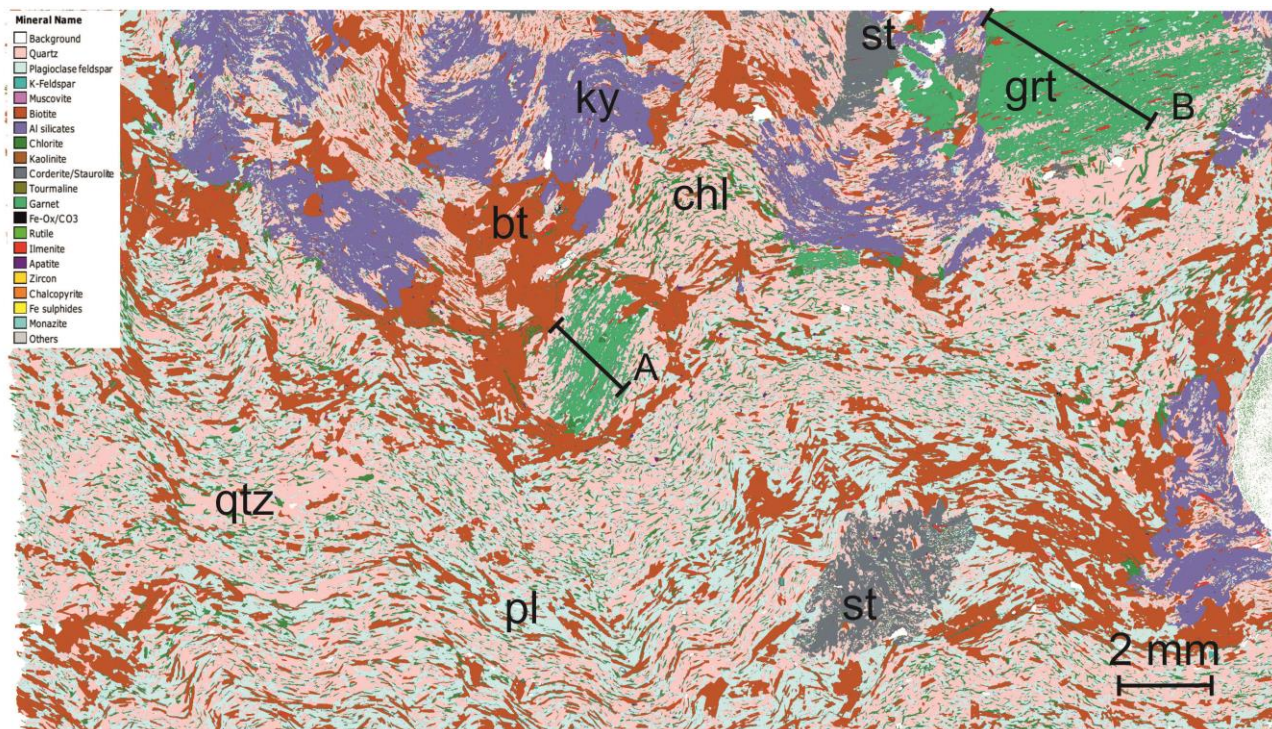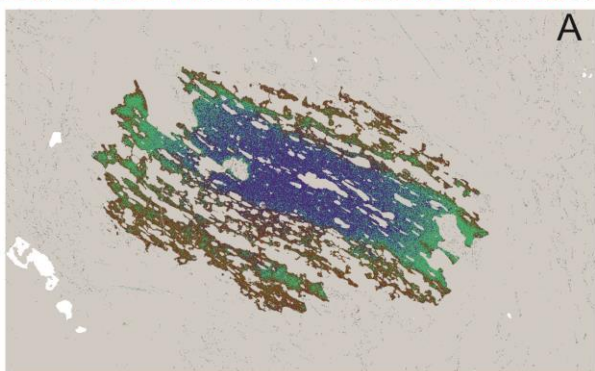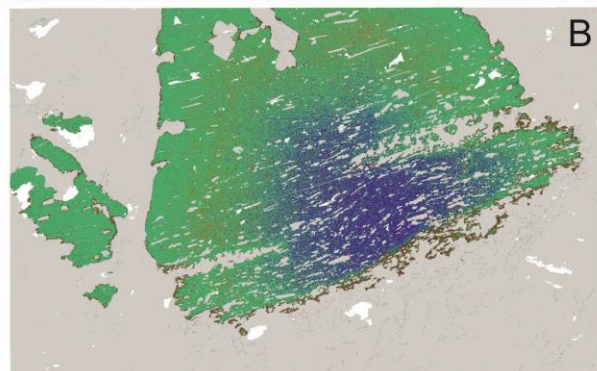

TTKI-2005-73

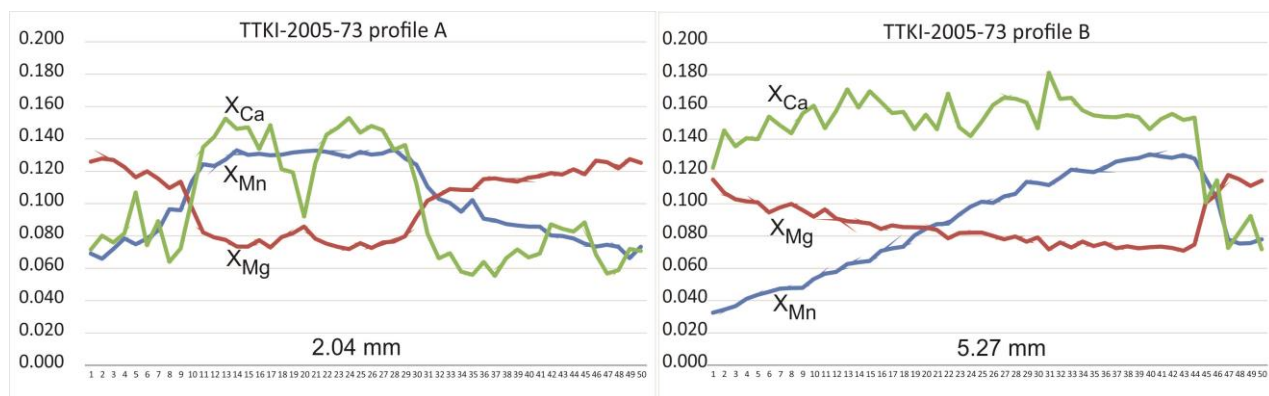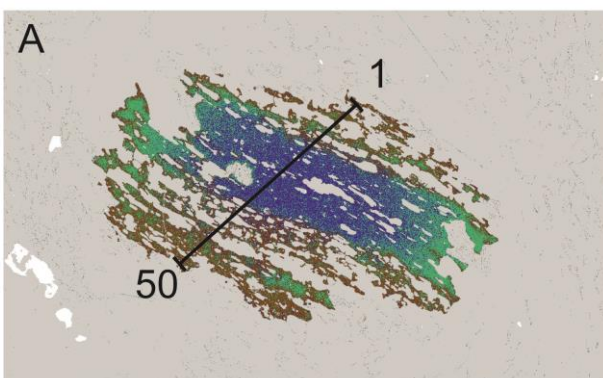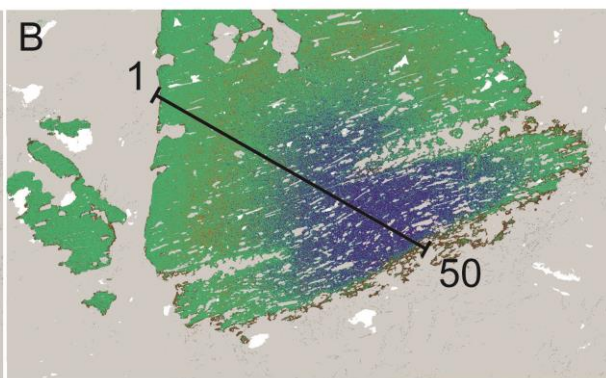



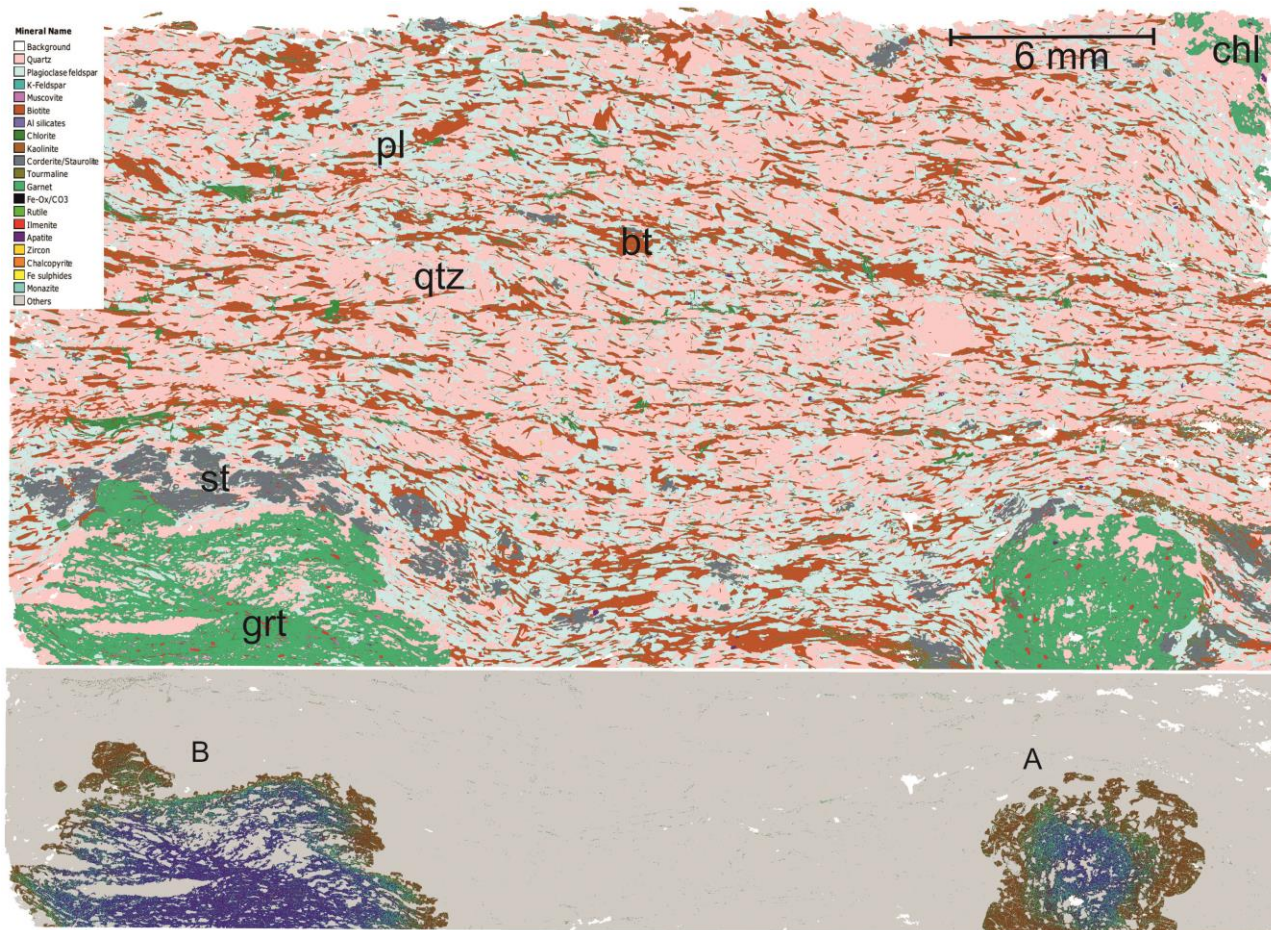

TTKI-2005-84
