# Supplementary material
Source: MDPI journal article supplement (https://www.mdpi.com/2075-163X/10/11/1034)
Supplement: s1 [file s1]

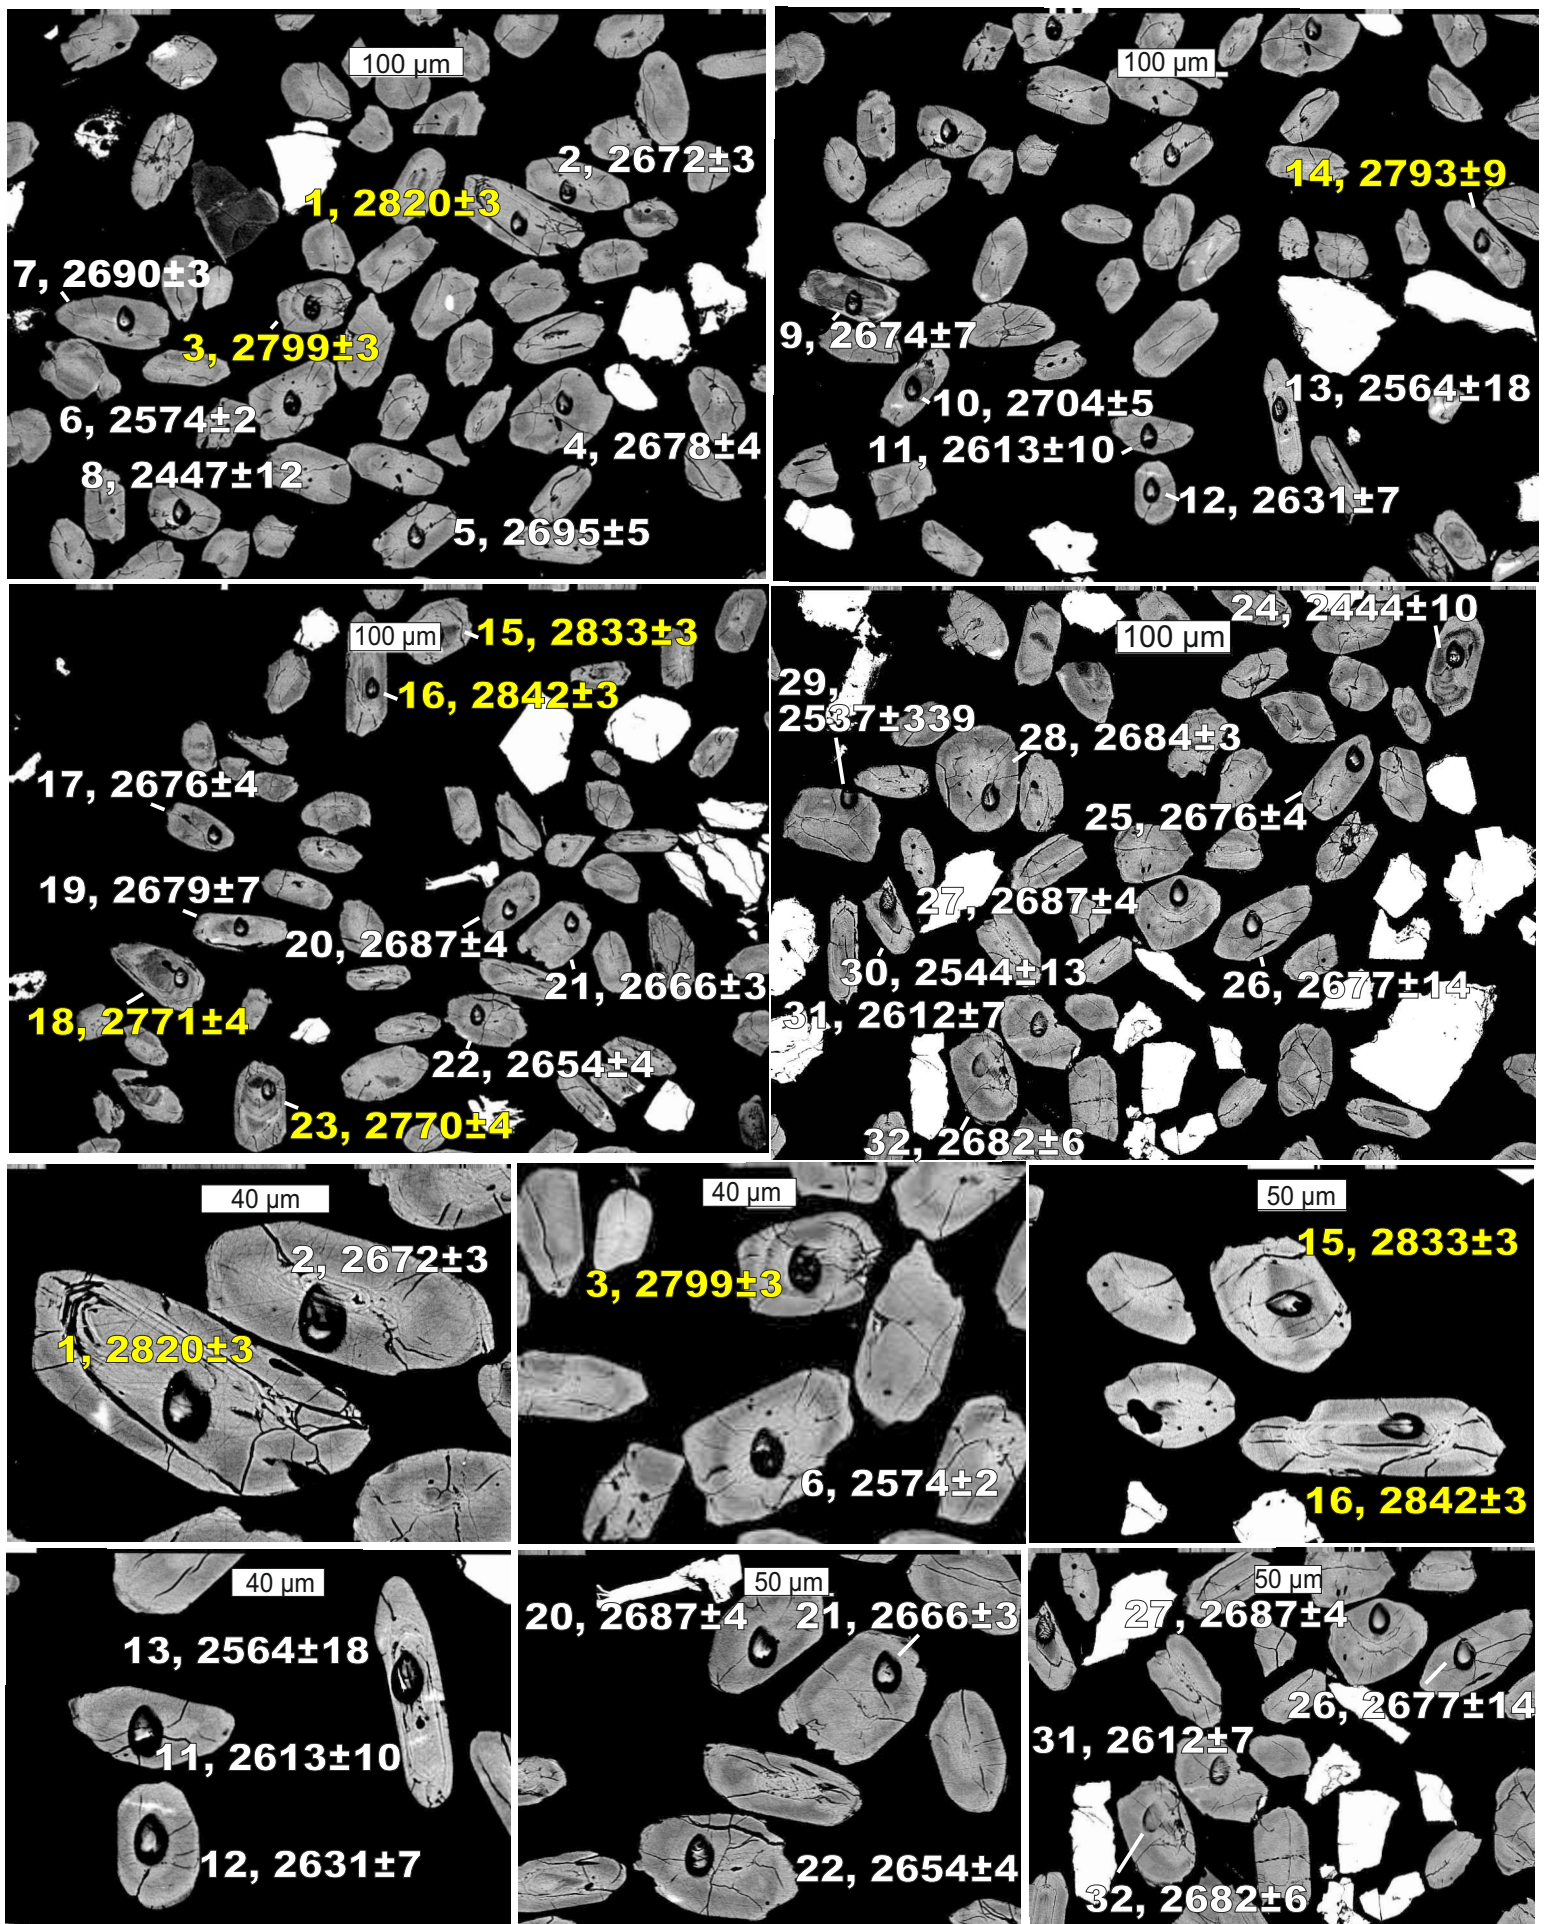

Appendix 5. BSE images of zircon grains analysed using the SIMS. The uppermost four figures show overviews of all analysed grains, the lowermost six images are closeups of selected grains. The numbers next to the analysis spots are for the analysis number in Appendix 6 (A1843-xx) and the  $^{207}\text{Pb}/^{206}\text{Pb}$  age.
